# Supplementary material
Source: ML conference proceedings conference paper supplement (https://proceedings.neurips.cc/paper_files/paper/2009/hash/f899139df5e1059396431415e770c6dd-Abstract.html)
Supplement: Supplementary file 1 [file f899139df5e1059396431415e770c6dd-Supplemental.zip]

Archive with 1 entries (1 files):
- extra/NIPS2009_0100_extra.pdf
