# Supplementary material
Source: ML conference proceedings conference paper supplement (https://proceedings.neurips.cc/paper_files/paper/2009/hash/f899139df5e1059396431415e770c6dd-Abstract.html)
Supplement: Supplementary file 1 [file f899139df5e1059396431415e770c6dd-Supplemental.zip › extra/NIPS2009_0100_extra.pdf]

# Supplementary Materials

This paper contains supplementary information and full derivations for “Whose Vote Should Count More: Optimal Integration of Labels from Labelers of Unknown Expertise”, *NIPS* 2009, by Jacob Whitehill, Paul Ruvolo, Tingfan Wu, Jacob Bergsma, and Javier Movellan, at the University of California San Diego.

## 1 Full EM Derivation

Recall the probability of correct image label given the labeler’s ability  $\alpha_i$  and the image’s difficulty parameter  $\beta_j$ :

$$p(L_{ij} = Z_j | \alpha_i, \beta_j) = \frac{1}{1 + e^{-\alpha_i \beta_j}} \quad (1)$$

The observed labels are samples from the  $\{L_{ij}\}$  random variables. The unobserved variables are the true image labels  $Z_j$ , the different labeler accuracies  $\alpha_i$ , and the image difficulty parameters  $1/\beta_j$ . Our goal is to efficiently search for the most probable values of the unobservable variables  $\mathbf{Z}$ ,  $\boldsymbol{\alpha}$  and  $\boldsymbol{\beta}$  given the observed data. Here we can use Expectation-Maximization approach (EM) to obtain maximum likelihood estimates of the parameters of interest:

**E step:** Let the set of all given labels for an image  $j$  be denoted as  $\mathbf{l}_j = \{l_{ij'} \mid j' = j\}$ . Note that not every labeler must label every single image. In this case, the index variable  $i$  in  $l_{ij'}$  refers only to those labelers who labeled image  $j$ . We need to compute the posterior probabilities of all  $z_j \in \{0, 1\}$  given the  $\boldsymbol{\alpha}, \boldsymbol{\beta}$  values from the last M step and the observed labels:

$$\begin{aligned} p(z_j | \mathbf{l}, \boldsymbol{\alpha}, \boldsymbol{\beta}) &= p(z_j | \mathbf{l}_j, \boldsymbol{\alpha}, \boldsymbol{\beta}_j) \\ &\propto p(z_j | \boldsymbol{\alpha}, \boldsymbol{\beta}_j) p(\mathbf{l}_j | z_j, \boldsymbol{\alpha}, \boldsymbol{\beta}_j) \\ &\propto p(z_j) \prod_i p(l_{ij} | z_j, \alpha_i, \beta_j) \end{aligned}$$

where we noted that  $p(z_j | \boldsymbol{\alpha}, \boldsymbol{\beta}_j) = p(z_j)$  using the conditional independence assumptions from the graphical model.

**M step:** We maximize the auxiliary function  $Q$ , which is defined as the expectation of the joint log-likelihood of the observed and hidden variables  $(\mathbf{l}, \mathbf{Z})$  given the parameters  $(\boldsymbol{\alpha}, \boldsymbol{\beta})$ , w.r.t. the posterior probabilities of the  $\mathbf{Z}$  values computed during the last E step:

$$\begin{aligned} Q(\boldsymbol{\alpha}, \boldsymbol{\beta}) &= E [\ln p(\mathbf{l}, \mathbf{z} | \boldsymbol{\alpha}, \boldsymbol{\beta})] \\ &= E \left[ \ln \prod_j \left( p(z_j) \prod_i p(l_{ij} | z_j, \alpha_i, \beta_j) \right) \right] \\ &\quad \text{since } l_{ij} \text{ are cond. indep. given } \mathbf{z}, \boldsymbol{\alpha}, \boldsymbol{\beta} \\ &= \sum_j E \left[ \ln p(z_j) + \sum_i \ln p(l_{ij} | z_j, \alpha_i, \beta_j) \right] \\ &= \sum_j E [\ln p(z_j)] + \sum_{ij} E [\ln p(l_{ij} | z_j, \alpha_i, \beta_j)] \end{aligned}$$

where the expectation is taken over  $\mathbf{z}$  given the old parameter values  $\alpha^{old}, \beta^{old}$  as estimated during the last E-step. Let us define  $p^k = p(z_j = k | \mathbf{l}, \alpha^{old}, \beta^{old})$ . Then we can expand this expectation as:

$$\begin{aligned} Q(\alpha, \beta) &= \sum_j \sum_{k=0}^1 p^k \ln p(z_j = k) + \\ &\quad \sum_{ij} \sum_{k=0}^1 p^k \ln p(l_{ij} | z_j = k, \alpha_i, \beta_j) \end{aligned}$$

Based on Equation (1), we can compute  $p(l_{ij} | z_j = k, \alpha_i, \beta_j)$  as:

$$p(l_{ij} | z_j = 1, \alpha_i, \beta_j) = \sigma(\alpha_i \beta_j)^{l_{ij}} (1 - \sigma(\alpha_i \beta_j))^{1-l_{ij}}$$

and

$$p(l_{ij} | z_j = 0, \alpha_i, \beta_j) = \sigma(\alpha_i \beta_j)^{1-l_{ij}} (1 - \sigma(\alpha_i \beta_j))^{l_{ij}}$$

where  $\sigma(x) = 1/(1 + e^{-x})$  is the logistic function. To avoid clutter, we will represent  $\sigma(\alpha_i \beta_j)$  simply as  $\sigma$ . Then, after expanding the summation over  $k$  into the two cases  $z = 0$  and  $z = 1$ , we get:

$$\begin{aligned} Q(\alpha, \beta) &= \sum_j (p^1 \ln p(z_j = 1) + p^0 \ln p(z_j = 0)) + \\ &\quad \sum_{ij} p^1 [l_{ij} \ln \sigma + (1 - l_{ij}) \ln(1 - \sigma)] + \\ &\quad \sum_{ij} p^0 [(1 - l_{ij}) \ln \sigma + l_{ij} \ln(1 - \sigma)] \end{aligned}$$

Taking the first derivatives causes the first summation to vanish since it is constant w.r.t  $\alpha$  and  $\beta$ . Using the fact that

$$\frac{d}{dx} \sigma(x) = \sigma(x)(1 - \sigma(x))$$

we can differentiate  $Q$  to arrive at:

$$\begin{aligned} \frac{\partial Q}{\partial \alpha_i} &= \sum_j p^1 (l_{ij}(1 - \sigma)\beta_j - (1 - l_{ij})\sigma\beta_j) + \\ &\quad \sum_j p^0 ((1 - l_{ij})(1 - \sigma)\beta_j - l_{ij}\sigma\beta_j) \\ &= \sum_j (p^1 l_{ij} + p^0 (1 - l_{ij}) - (p^1 + p^0)\sigma) \beta_j \\ &= \sum_j (p^1 l_{ij} + p^0 (1 - l_{ij}) - \sigma) \beta_j \\ &\quad \text{since } p^0 + p^1 = 1 \end{aligned}$$

Similarly, we can derive:

$$\frac{\partial Q}{\partial \beta_j} = \sum_i (p^1 l_{ij} + p^0 (1 - l_{ij}) - \sigma) \alpha_i$$

The gradient equation for  $\frac{\partial Q}{\partial \alpha_i}$  has an intuitive interpretation: The first two terms compute the empirical probability of the given label  $l_{ij}$  being correct given posterior probabilities of  $Z_j$  from the previous E-Step. The  $\sigma$  that is subtracted is the model's current estimate of the probability that  $l_{ij}$

is correct given the current estimate of the labeler's ability and image's difficulty. Hence, the likelihood function will locally increase by increasing the labeler ability  $\alpha_i$  if the empirical estimate of the number of correct images labeled by labeler  $i$  (weighted by image difficulty) is greater than its previous belief of correctness (again, weighted by difficulty). Similar intuition applies to  $\frac{\partial Q}{\partial \beta_j}$  with regards to image difficulty<sup>1</sup>.

To find locally optimal values of the  $\alpha$  and  $\beta$  parameter we set the gradient to zero. The resulting equations are non-linear and thus need to be solved using iterative methods.

## 2 Multi-class Inference Based on the GLAD Model

Here we briefly derive an optimal inference algorithm for the multi-class case. We assume there are  $K$  different choices  $\{1, \dots, K\}$  for each image label. We continue under the initial assumption of GLAD as described in the main paper, which is that the probability of correct labeling is

$$p(L_{ij} = k | z_j = k, \alpha_i, \beta_j) = \sigma(\alpha_i \beta_j)$$

where  $\sigma$  is the logistic function. For the multi-class case, we further assume uniform probability over all *incorrect* responses, i.e., for all  $k' \neq k$ ,

$$p(L_{ij} = k' | z_j = k, \alpha_i, \beta_j) = \frac{1}{K-1}(1 - \sigma(\alpha_i \beta_j))$$

The M-step is exactly the same as for the two-class case, except now the posterior probabilities for  $Z_j$  must be calculated over  $K$  classes, not just 2. For the E-step, we must modify slightly the equations for probability of correctness and the auxiliary function: Then

$$p(l_{ij} | z_j = k, \alpha_i, \beta_j) = \sigma^{\delta(l_{ij}, k)} \left( \frac{1}{K-1}(1 - \sigma) \right)^{1 - \delta(l_{ij}, k)}$$

where  $\delta(a, b)$  is the Kronecker delta function. For brevity we write  $\delta(l_{ij}, k)$  simply as  $\delta$ . Then we can define  $Q$  as

$$\begin{aligned} Q &= \sum_j \sum_{k=1}^K p^k \ln p(z_j = k) + \sum_j \sum_{k=1}^K p^k \ln p(l_{ij} | z_j = k, \alpha_i, \beta_j) \\ \frac{\partial Q}{\partial \alpha_i} &= \sum_j \sum_{k=1}^K p^k [\delta(1 - \sigma)\beta_j - (1 - \delta)(\sigma\beta_j - \ln(K-1))] \\ &= \sum_j \sum_{k=1}^K p^k [\delta\beta_j - \delta\sigma\beta_j - \sigma\beta_j + \delta\sigma\beta_j + \ln(K-1) - \delta\ln(K-1)] \\ &= \sum_j \sum_{k=1}^K p^k [(\delta - \sigma)\beta_j + (1 - \delta)\ln(K-1)] \\ \frac{\partial Q}{\partial \beta_j} &= \sum_j \sum_{k=1}^K p^k [(\delta - \sigma)\alpha_i + (1 - \delta)\ln(K-1)] \end{aligned}$$

Similar to the derivation in the paper,  $p^k(\delta - \sigma)$  is positive only if  $l_{ij} = k$  and represents the difference between the prior belief that the labeler would answer correctly and the empirical correctness of his/her response, weighted by probability that the true label is  $k$ . The expression  $\ln(K-1)$  is 0 for the two-class problem, and hence the derivation in this supplement reduces to the two-class solution as described in the paper.

---

<sup>1</sup>Keep in mind that larger  $\beta$  means easier images.
